# Supplementary material
Source: bioRxiv or medRxiv preprint supplement (https://www.biorxiv.org/highwire/filestream/127591/field_highwire_adjunct_files/0/284125-1.pdf)
Supplement: Supplementary file [file 284125-1.pdf]

## Supplementary data:

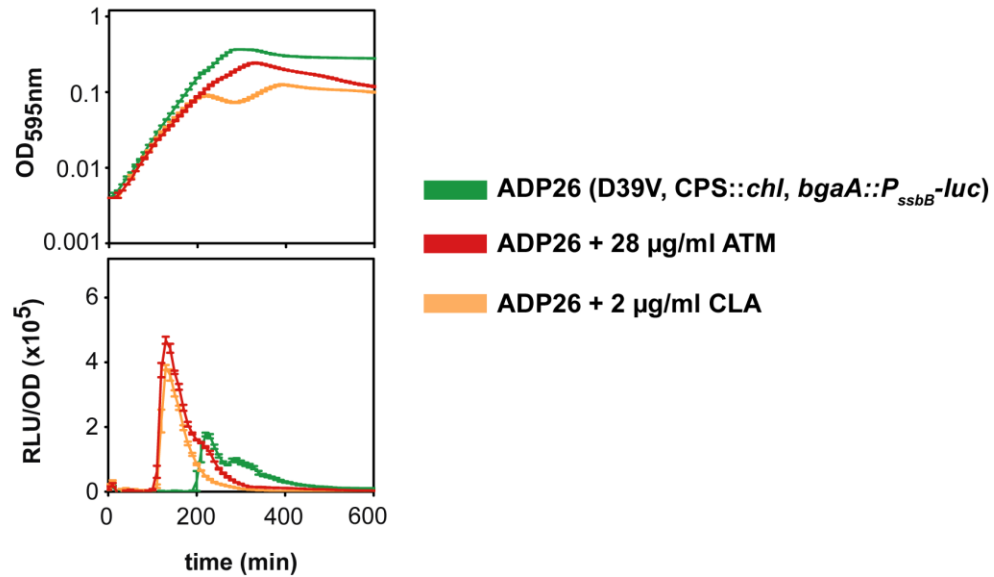

**Figure S1. Competence induction in an unencapsulated variant of D39V.** Both aztreonam (ATM) and clavulanic acid (CLA) are able to promote competence, as observed for the encapsulated strain, when grown in C+Y (pH 7.3). Note that unencapsulated strains can induce natural competence at lower pH than the parental encapsulated strain (Moreno-Gómez et al., 2017), explaining bioluminescence activity at pH 7.3, which is non-permissive for encapsulated strains in the absence of antibiotics.

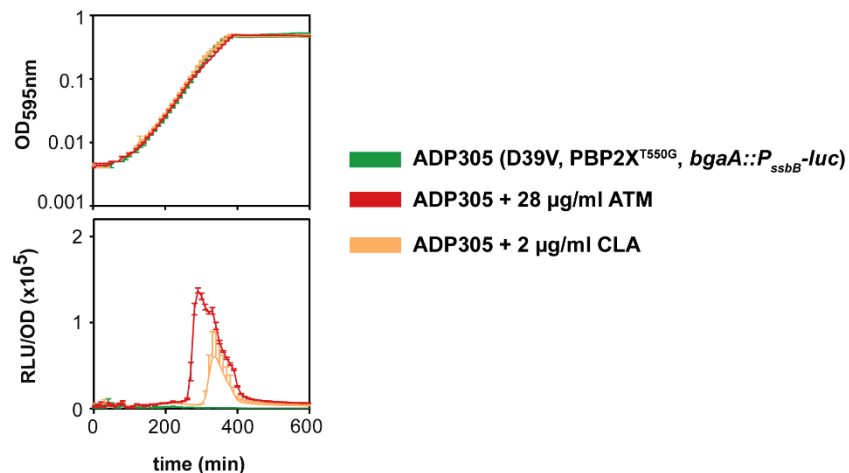

**Figure S2. Competence induction in the ADP305 mutant with reduced susceptibility to betalactams (PBP2X<sup>T550G</sup>).** Cells were grown in C+Y at competence-permissive pH 7.3. The average of 3 replicates and Standard Error of the Mean (SEM) are plotted for each condition. Despite the reduced susceptibility to betalactams, both aztreonam (ATM) and clavulanic acid (CLA) were able to induce competence, as observed for the wild type.

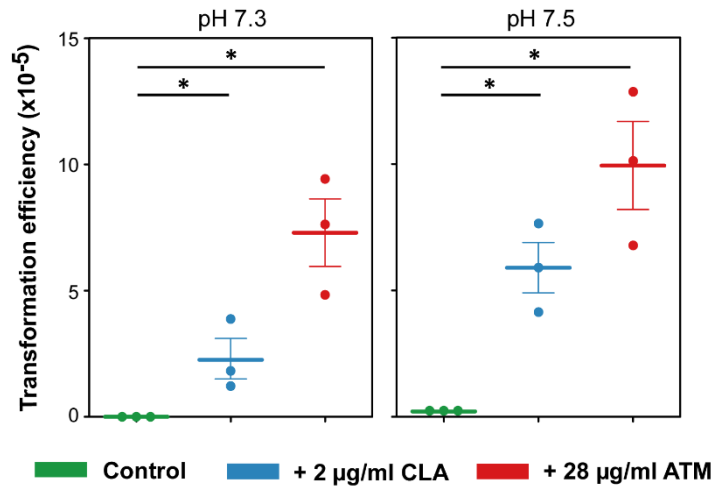

**Figure S3. Induction of horizontal gene transfer by aztreonam (ATM) and clavulanic acid (CLA).** DLA3 (tetracycline resistant) and MK134 (kanamycin resistant), were individually grown to  $OD_{595nm}$  0.4 in C+Y pH 6.8 at 37°C. Then, a mixed 100-fold dilution of both strains were grown in C+Y pH 7.3 (non-permissive conditions) or pH 7.5 (permissive conditions) to  $OD_{595nm}$  0.3 to promote the transfer of genes. Antibiotics were added where indicated (2 µg/ml clavulanic acid or 28 µg/ml aztreonam). Afterwards, serial dilutions of cultures were plated with or without antibiotics (for the recovery of the total viable counts) and with the combination of 250 µg/ml of kanamycin plus 1 µg/ml tetracycline, and the ratio between total viable cells and transformants was calculated. \*Statistically significant more transformants than wild type, mean comparison test  $p < 0.05$ .

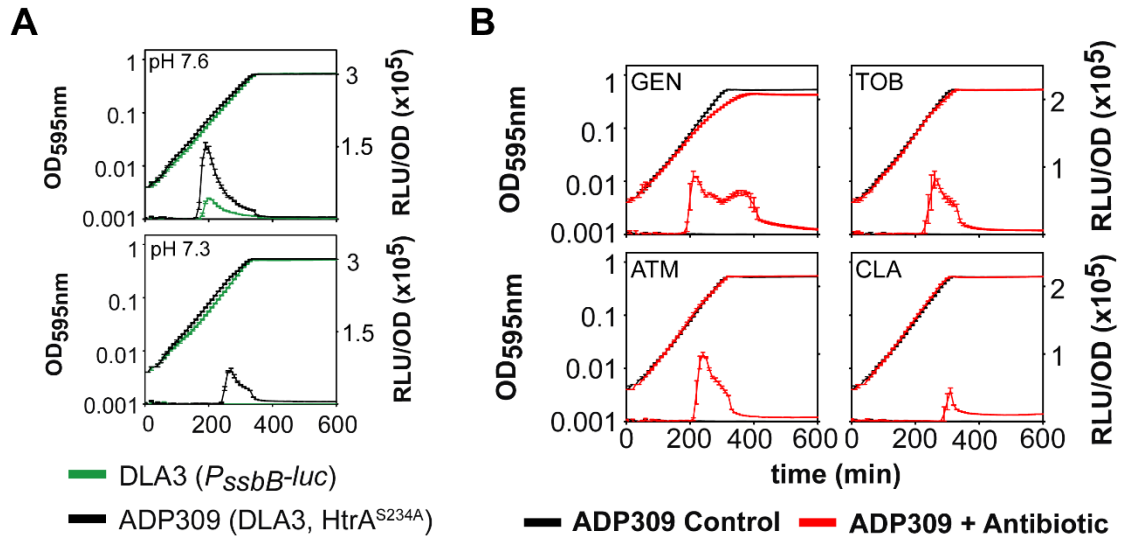

**Figure S4. A) Growth curves (OD<sub>595</sub>) and bioluminescence activity (RLU/OD<sub>595</sub>) of wild type and HtrA<sup>S234A</sup> strains.** Strains DLA3 (*P<sub>ssbB-luc</sub>*; green lines) and ADP309 (*P<sub>ssbB-luc</sub>*, HtrA<sup>S234A</sup>; black lines) were grown in C+Y medium at pHs 7.6 (top) and 7.3 (bottom). ADP309 shows a hypercompetent phenotype as described before (Stevens et al., 2011). Average of 3 replicates and Standard Error of the Mean (SEM) are plotted. **B) Growth curves (OD<sub>595</sub>) and bioluminescence activity (RLU/OD<sub>595</sub>) of the HtrA<sup>S234A</sup> strain in the presence of several antibiotics.** Strain ADP309 (*P<sub>ssbB-luc</sub>*, HtrA<sup>S234A</sup>) was grown in C+Y medium at pH 7.25, where it is not naturally competent anymore (black lines). Antibiotics used: 10 µg/ml gentamicin (GEN), 28 µg/ml tobramycin (TOB), 28 µg/ml aztreonam (ATM) and 2 µg/ml clavulanic acid (CLA). All antibiotics tested were able to induce competence, suggesting that ATM and CLA induce competence by another mechanism, independent of HtrA.

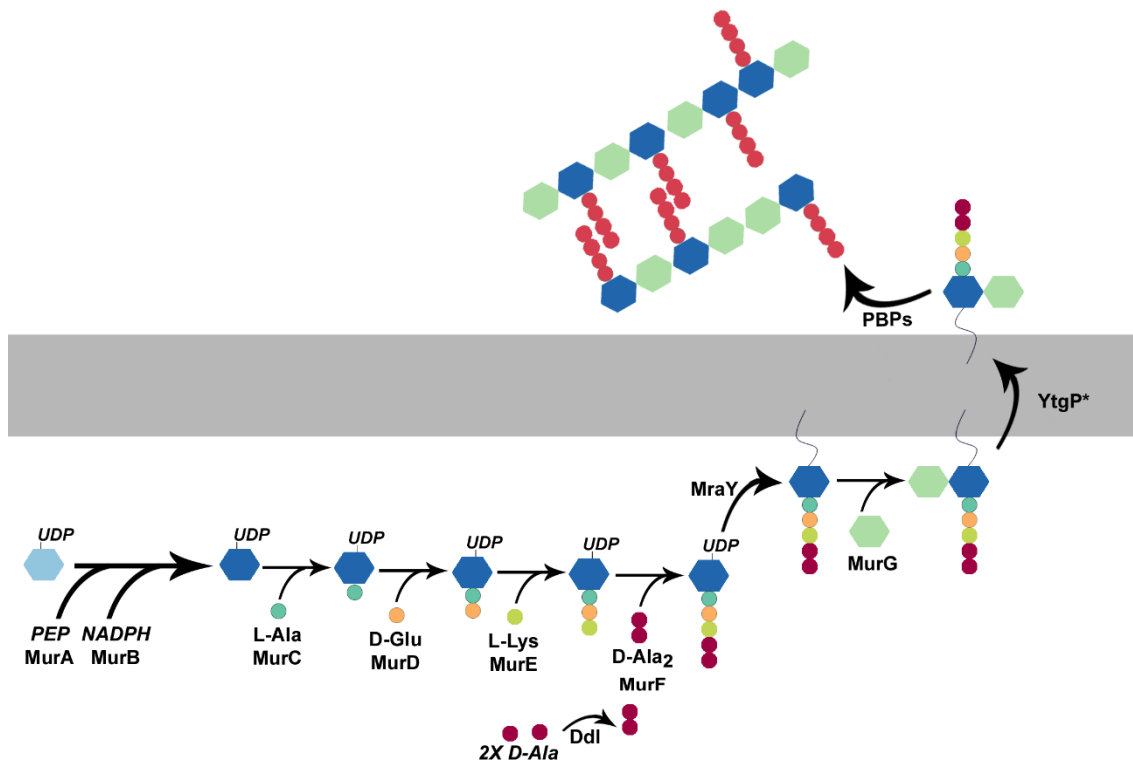

**Figure S5. Representation of cell wall synthesis in *Streptococcus pneumoniae*.** The first stage of peptidoglycan synthesis is the assembly of the pentapeptide precursor, executed by six enzymes (MurA-F). The second stage, which occurs on the intracellular part of the membrane, drives the synthesis of lipid II (MraY and MurG). Then, lipid II is flipped and exposed at the external part of the membrane, potentially by YtgP<sup>+</sup>. The final stage occurs on the extracellular face of the membrane and involves the continuous transglycosylation and transpeptidation activities of the Penicillin-Binding Proteins (PBPs).

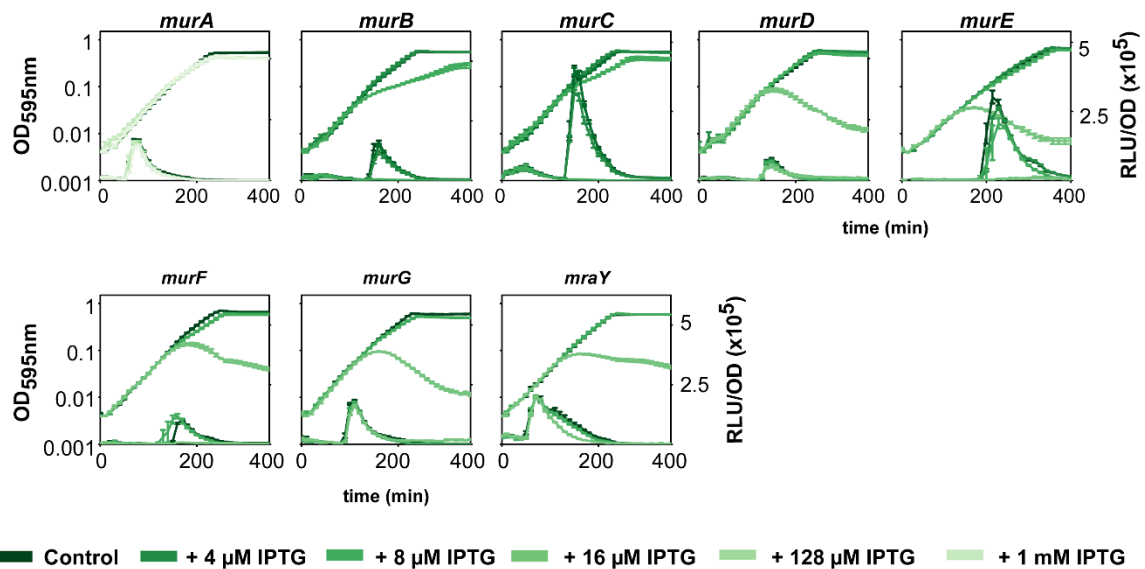

**Figure S6. Repression of genes involved in pentapeptide (*murA-F*) and lipid II (*murG* and *mraY*) formation by CRISPRi.** No effect on competence was observed after depleting the individual genes. Detection of competence development was performed in C+Y medium at pH 7.5, permissive for natural competence. IPTG was added to the medium at the beginning, at different final concentrations (128 μM and 1 mM for *murA*; 4 μM and 8 μM for *murB* and *murC*; 8 μM and 16 μM for the other genes). The values represent averages of three replicates with SEM. Experiments were also reproduced at pH 7.3 (non-permissive) to confirm that the depletion of none of these genes causes an upregulation of competence (data not shown).

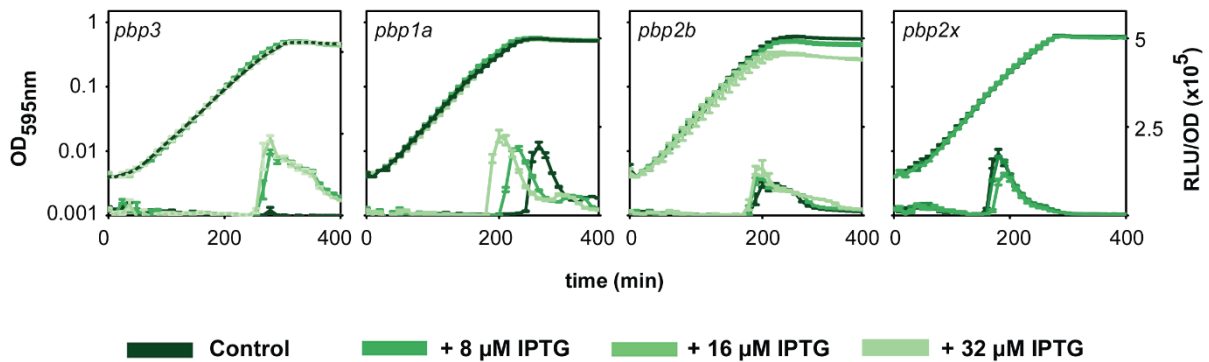

**Figure S7. CRISPRi-dependent downregulation of *pbp1a* and *pbp3* leads to competence induction.** Depletion of *pbp1a* and *pbp3* by induction of dCas9 with IPTG upregulates competence development. In contrast, depletion of *pbp2b* and *pbp2x* does not have any effect on the regulation of this process. Detection of competence development was performed in C+Y medium at a permissive pH (pH 7.5). IPTG was added to the medium at the beginning, at different final concentrations (8  $\mu$ M and 16  $\mu$ M for *pbp1a*; 16  $\mu$ M and 32  $\mu$ M for the other *pbp* genes). The values represent averages of three replicates with SEM.

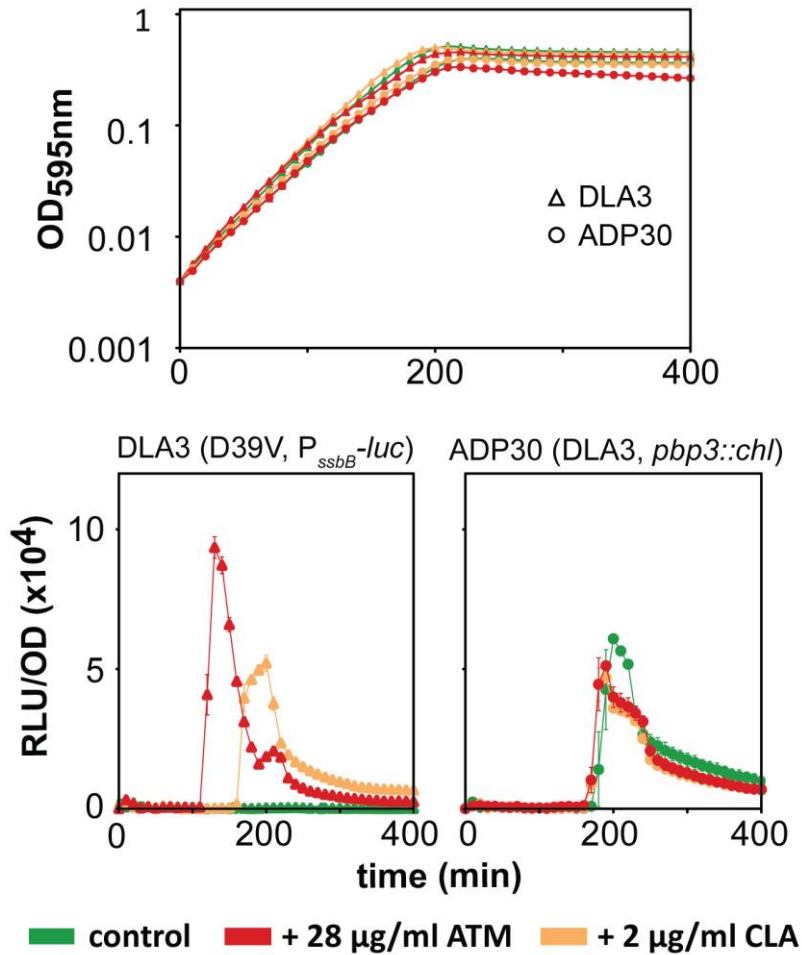

**Figure S8. Natural competence in DLA3 (P<sub>ssbB</sub>-luc) and ADP30 (P<sub>ssbB</sub>-luc, pbp3::chl).** To confirm that *pbp3* is involved in competence development, we compared the natural competence activation of the wild type (DLA3, triangles) with the *pbp3* mutant (ADP30, dots). At pH 7.3, only the mutant was able to become competent (green), confirming the upregulation of this pathway in the absence of PBP3. In addition, competence is not further upregulated in the presence of aztreonam (ATM) or clavulanic acid (CLA) in the *pbp3* mutant.



**A**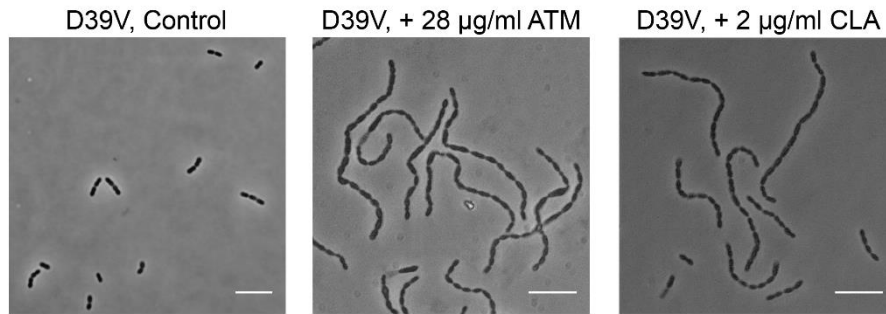**B**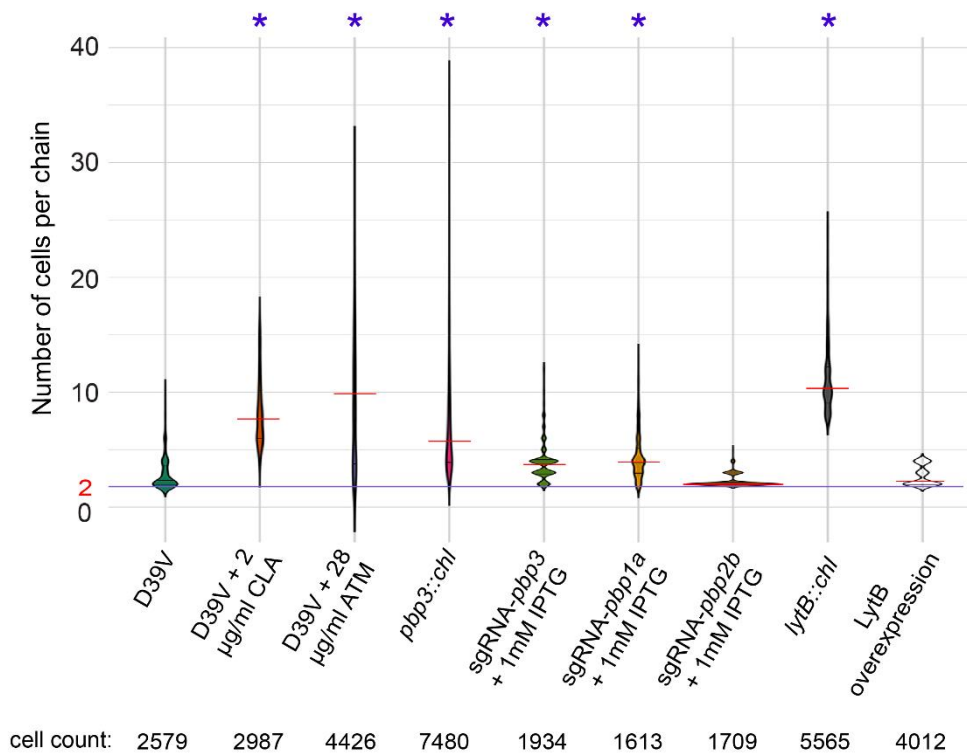

**Figure S9. ATM and CLA induce chain formation.** Cells were grown in C+Y acid medium (pH 6.8) until OD 0.1 (density at which cells become naturally competent in non-acidic conditions). **A) Phase-contrast images.** Scale: 6 µm. **B) Length of the chains.** Horizontal red line indicates the average number of cells per chain while the purple line represents the typical diplococcus state. The addition of ATM or CLA results in the presence of longer chains, as does the deletion and depletion of *pbp3*. Depletion of *pbp1a* induces chain formation, contrary to the *pbp2b* depletion phenotype. The absence of *lytB* also resulted in an increase of chain length, while its overexpression restores normal chain length. \*Statistically significantly longer chains than wild type (mean comparison test,  $p < 0.05$ ).

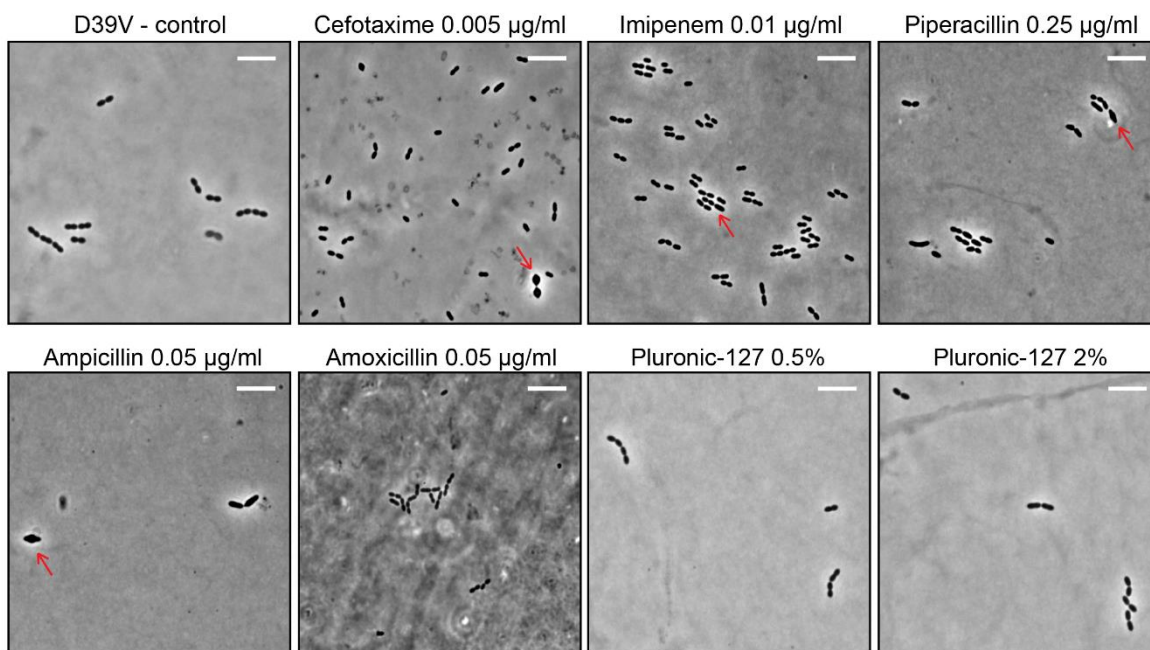

**Figure S10. Microscopy of the D39V strain grown until  $OD_{595nm}$  0.1 in presence of several beta-lactams or Pluronic-127. None of the beta-lactams nor Pluronic-127 induce a chaining phenotype. Red arrows indicate a phenotype change due to antibiotic stress.**

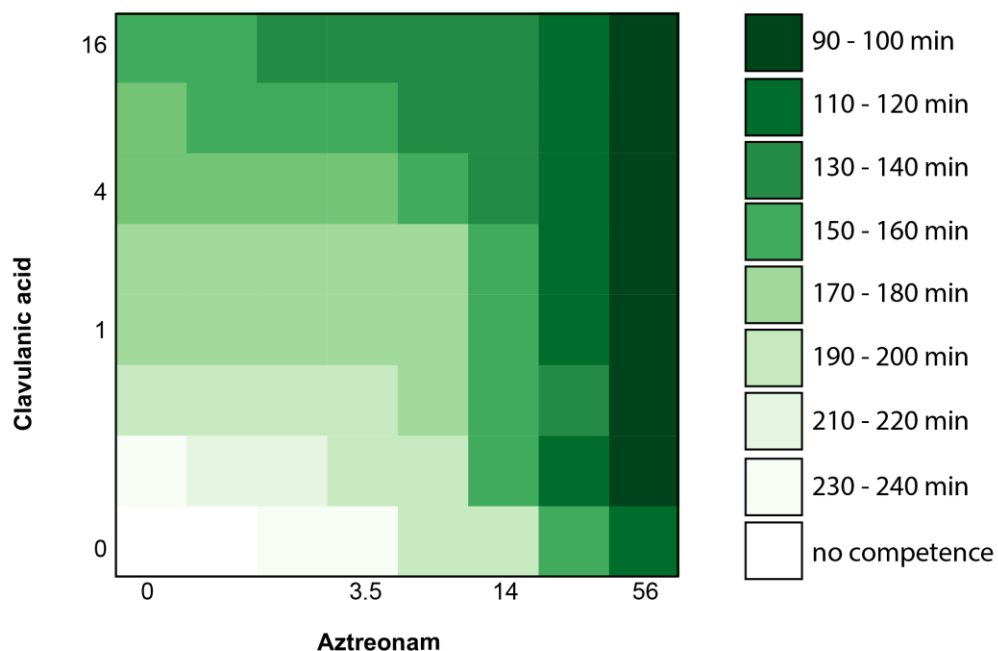

**Figure S11. Multi-dose-checkerboard of sub-inhibitory concentrations of aztreonam and clavulanic acid.** Values represent the first time point where the RLU value cells expressing luciferase from the *ssbB* promoter (strain DLA3) is  $\geq 100$  units in each condition. Range: 90 minutes (darkest green) to 240 min (lightest green); white conditions represent no competence induction at pH 7.3.

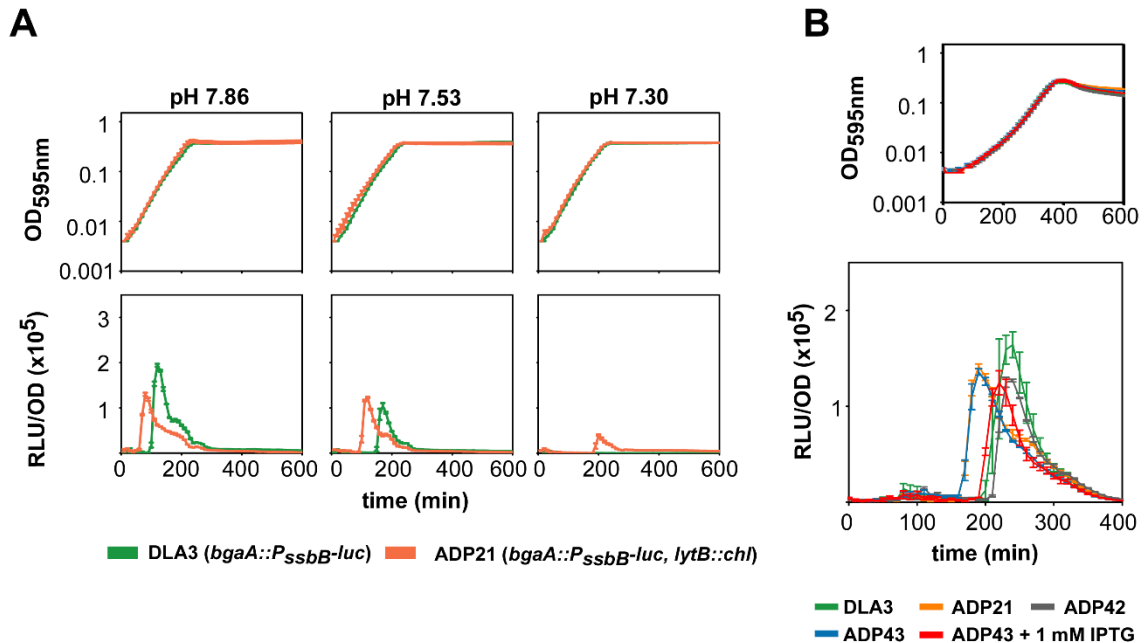

**Figure S12. A) Natural competence in DLA3 ( $P_{ssbB}$ -*luc*) and ADP21 ( $P_{ssbB}$ -*luc, lytB::chl*), in a range of three different pHs.** In all the conditions, the *lytB* mutant strain showed an earlier development of competence. Even at pH 7.3, where the wild type strain did not become competent, the *lytB* mutant showed bioluminescence activity, indicating competence activation. **B) LytB complementation restores normal natural competence.** Strains showing a phenotype with many chains of cells [ADP21 (*lytB::chl*) and ADP43 (inducible *lytB* in *lytB::chl* background without presence of the inducer IPTG)] were hypercompetent compared with strains showing a wild type phenotype [DLA3 (control), ADP42 (constitutive expression of LytB) or the induction of LytB in ADP43 with 1mM IPTG]. Cells were grown in C+Y at competence-permissive pH 7.6.

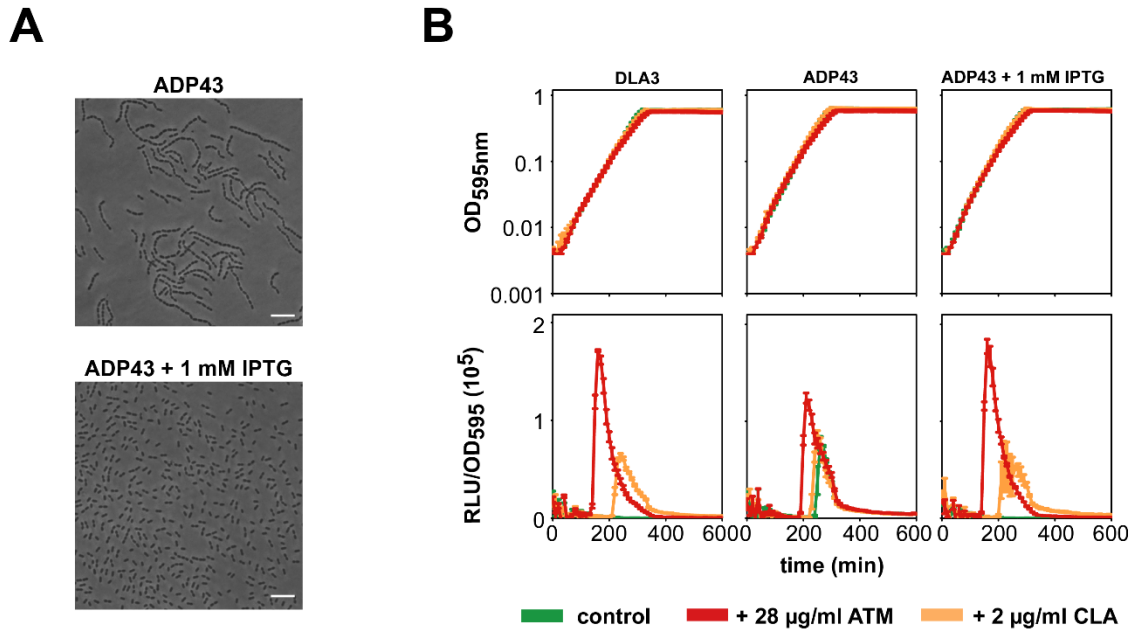

**Figure S13. A)** Microscopy of strain ADP43 (*D39V*, *bgaA::P<sub>ssbB-luc</sub>*, *cep::P<sub>lac-lytB</sub>*, *lytB::chl*, *prsA::lacI*) in the absence (top) or presence of 100 µM IPTG (bottom) at OD<sub>595nm</sub> 0.1. **B)** Effect of ATM and CLA in DLA3 and ADP43, in the absence or in presence of 1 mM IPTG at the non-permissive pH 7.3. In the absence of IPTG in strain ADP43, as chains are already there, the presence of ATM and CLA cannot induce more chains, so competence is only slightly accelerated (occurs approximately 10 - 20 minutes earlier than the strain without antibiotics). Furthermore, this strain is naturally hypercompetent, relative to the wild-type DLA3, which is not able to develop competence at this pH. However, the addition of IPTG in ADP43 restores the normal phenotype, and thereby, the strain behaves as DLA3: no competence activation in the control condition, and similar upregulation profiles by ATM and CLA due to the chaining-induced phenotype. Abbreviations: ATM = 28 µg/ml aztreonam, CLA = 2 µg/ml clavulanic acid.

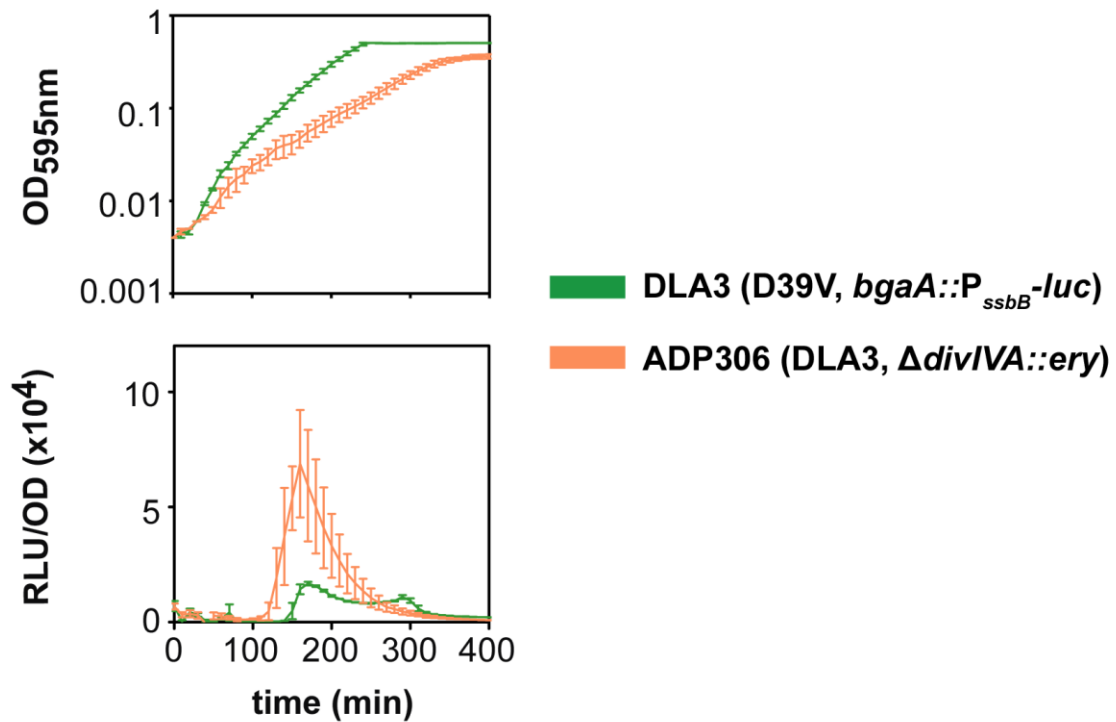

**Figure S14. A *divIVA* mutant shows a hypercompetent phenotype.** Cells were grown in C+Y at competence-permissive pH 7.9. The average of 3 replicates and Standard Error of the Mean (SEM) are plotted for each condition. Note that the *divIVA* mutant grows significantly slower and, besides a cell chaining phenotype, also shows chromosome segregation defects (Fadda et al., 2007) and therefore the hypercompetent phenotype might not only be related to the cell chaining phenotype.

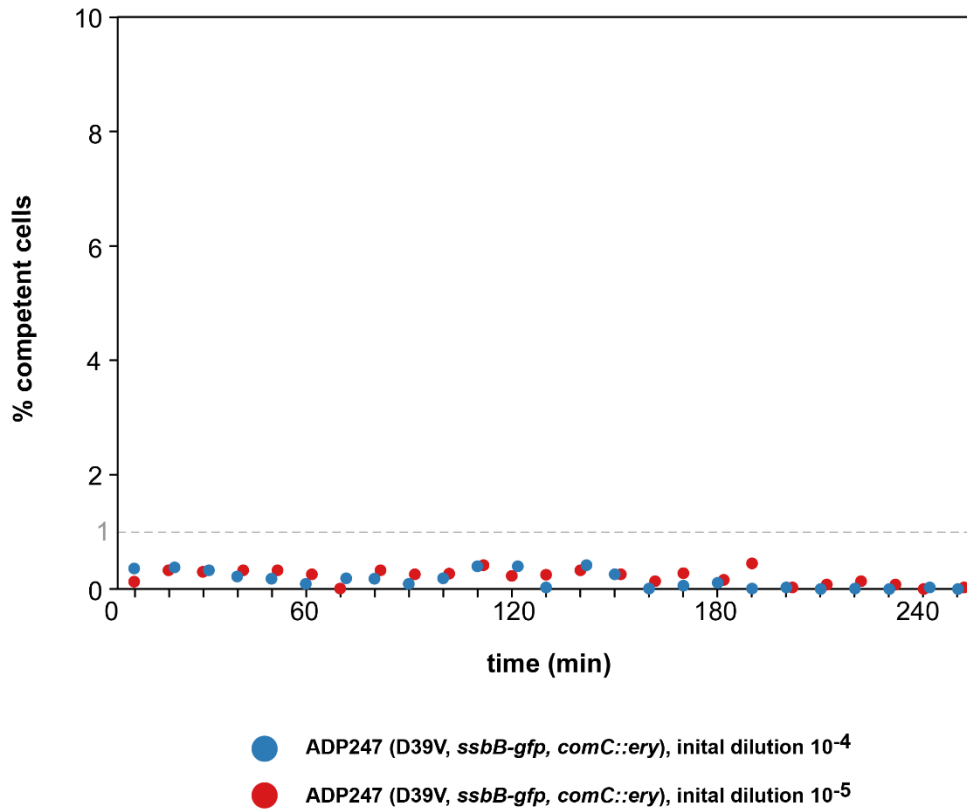

**Figure S15. Estimation of the false positive rate in FACS experiments.** A strain containing a translational fusion of GFP to the competence-induced SsbB protein (Aprianto et al., 2016), but lacking *comC*, was used as a negative control for our FACS experiments. This strain cannot become competent if there is no CSP present in the medium. Cells were grown at pH 7.8 and sampled (12000 particles per sample) every 10 minutes. The percentage of false-positive particles was below 1% of the population along the experiment, from two different initial dilution densities ( $10^{-4}$  in blue and  $10^{-5}$  in red).

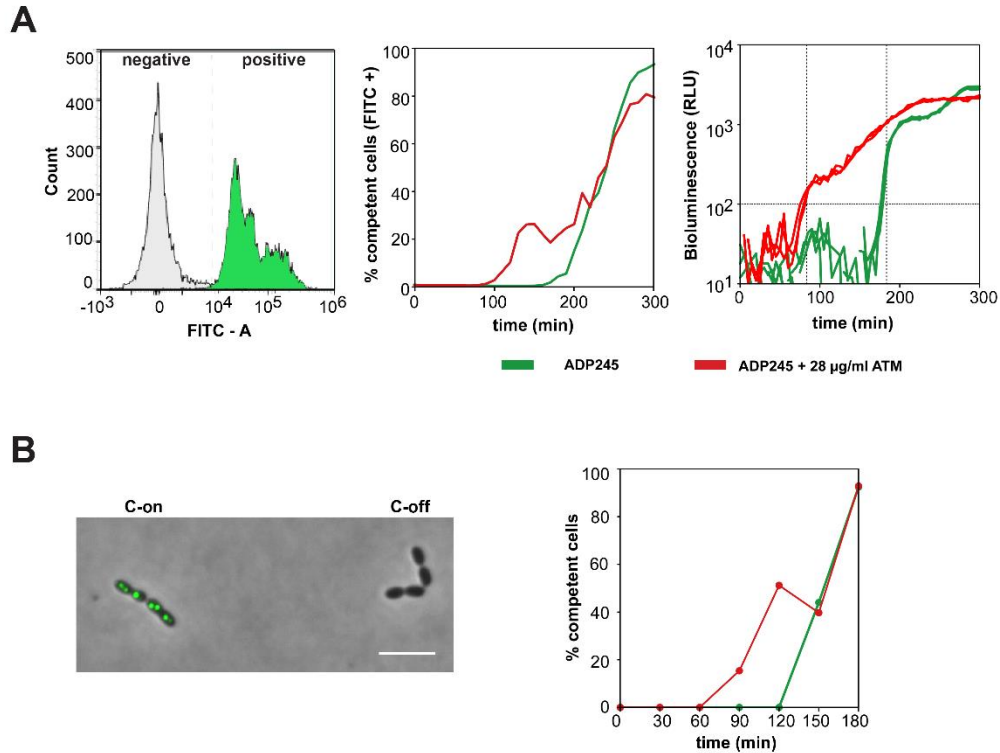

**Figure S16. A)** Left, cutoff value for FITC-positive detection (competence activation). Cells untreated (grey) and treated with CSP<sub>1</sub> (green) were used to establish the cutoff value for FITC-positive (competence activation). Center, competence (FITC +) was induced earlier when aztreonam was present (red) than in the control condition (green). The slope of competence induction was drastically less steep with ATM, confirming a loss of synchronization within the population. Right, luminescence activity along the experiment. Vertical dashed lines show the first time point with GFP detection in presence (first line, 90 min) and absence (second line, 170 min) of ATM. Horizontal dashed line shows the cut-off of competence induction (100 RLU, established previously (Moreno-Gómez et al., 2017)). The clear agreement between the flow cytometry (GFP) and luminescence data (*luc*) suggests that the luminometer used in all the experiments was able to accurately detect the timepoint where a significant portion of cells first became competent. **B)** Single cells were observed with fluorescence microscopy every 30 minutes, observing the same trend as in FACS experiments (panel A, center). An average of 250 cells were counted at every time point. White scale bar: 4  $\mu$ m. C-on: competence upregulation. Note that in this experiment, cells were grown in C+Y at pH 7.9, to detect competence earlier than in Figure 4, to reduce the number of required reads in the FACS machine.



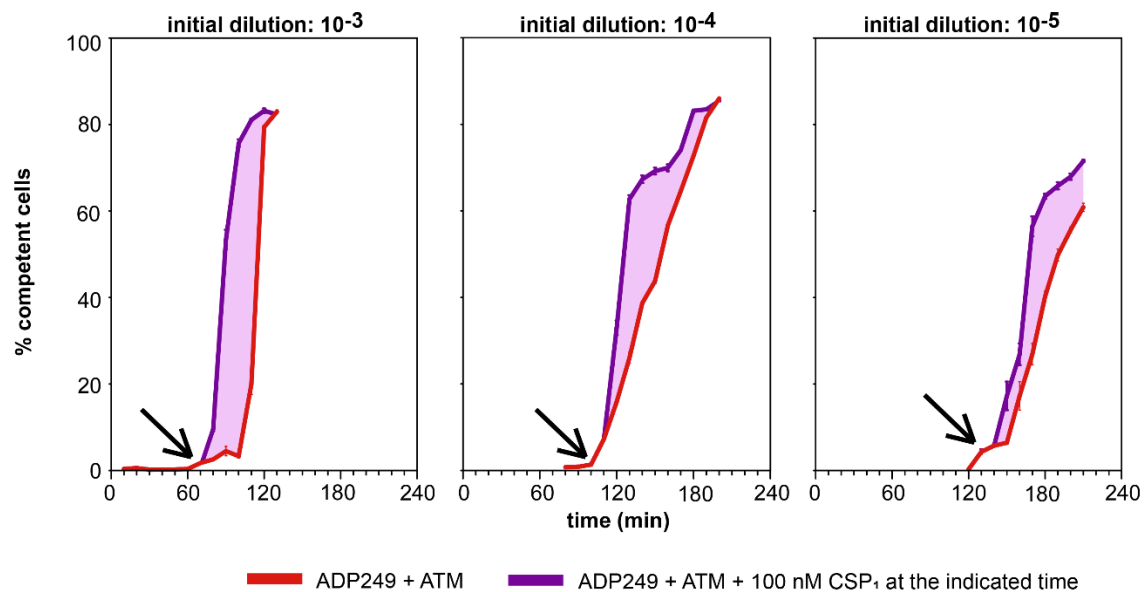

**Figure S17. Competence synchronization in presence of ATM and external CSP<sub>1</sub>.** Red lines show the percentage of competent cells over time in presence of 28  $\mu\text{g/ml}$  of aztreonam (ATM); the data corresponds to Figure 5). On the first positive value at each dilution (indicated by the arrows), 100 nM of synthetic CSP<sub>1</sub> was added to half of the remaining wells, and competence synchronization was tracked over time (purple line). The difference between presence or absence of CSP<sub>1</sub> is shown in pink. This data suggests that in the presence of ATM, competence signal propagation is slower by reduced CSP in the extracellular pool.

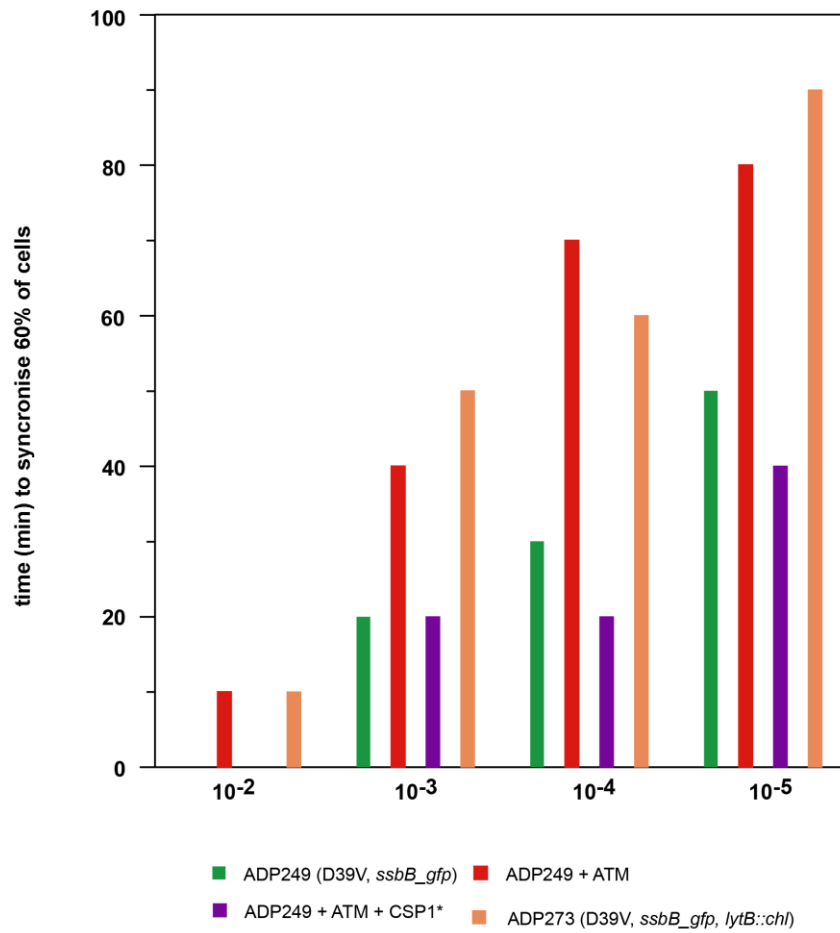

**Figure S18.** Lapse of time (minutes) between the first time point where competence was detected, and the value with  $\geq 60\%$  of competence in the overall population (data from Figures 5B and S17). In the initial dilution ( $10^{-2}$ ), there is barely a difference between control (green), presence of ATM (red) or *lytB* mutant (orange), because there was no time to induce chain formation. Actually, green and purple bars for initial inoculum density  $10^{-2}$  are missing as more than 60% of the cells were already competent in the first measurement. In contrast, in the other three initial dilutions, both ATM treatment and *lytB* deletion nearly doubled the time to synchronize 60% of the cells. The addition of exogenous 100 nM CSP<sub>1</sub> in the ATM condition (purple), reduced the synchronization time again to levels comparable to the control (data from Figure S17).

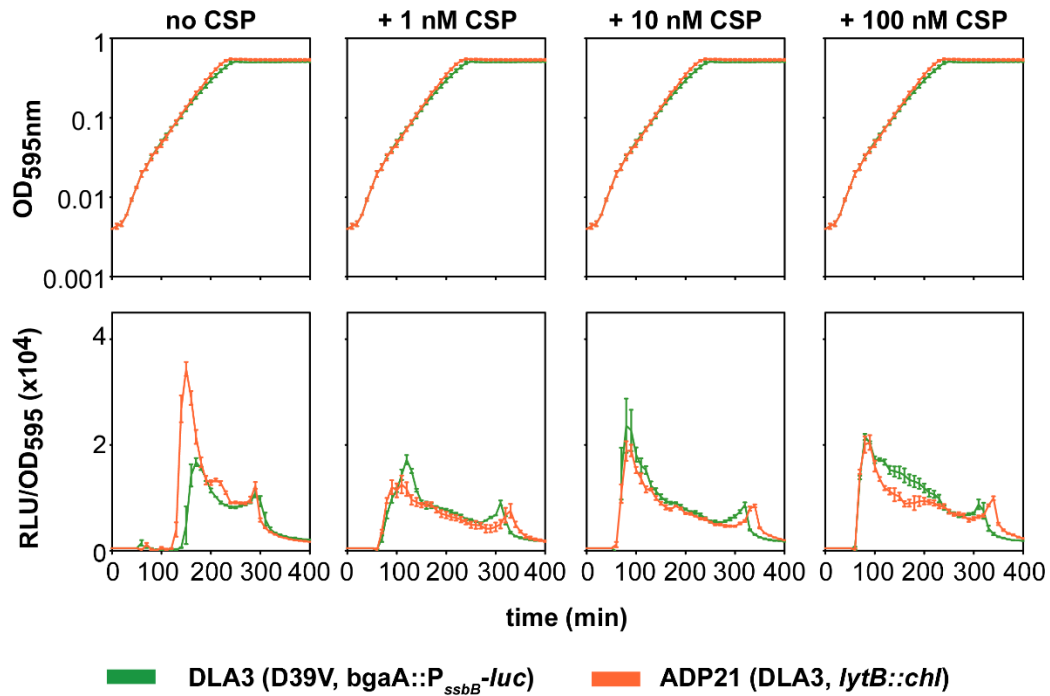

**Figure S19. Competence activation by addition of exogenous CSP<sub>1</sub> in wild type and *lytB* mutant cells.** Cells were grown in C+Y at competence-permissive pH 7.6. After 60 minutes, the indicated concentration of CSP was added. The average of 3 replicates and Standard Error of the Mean (SEM) are plotted for each condition.

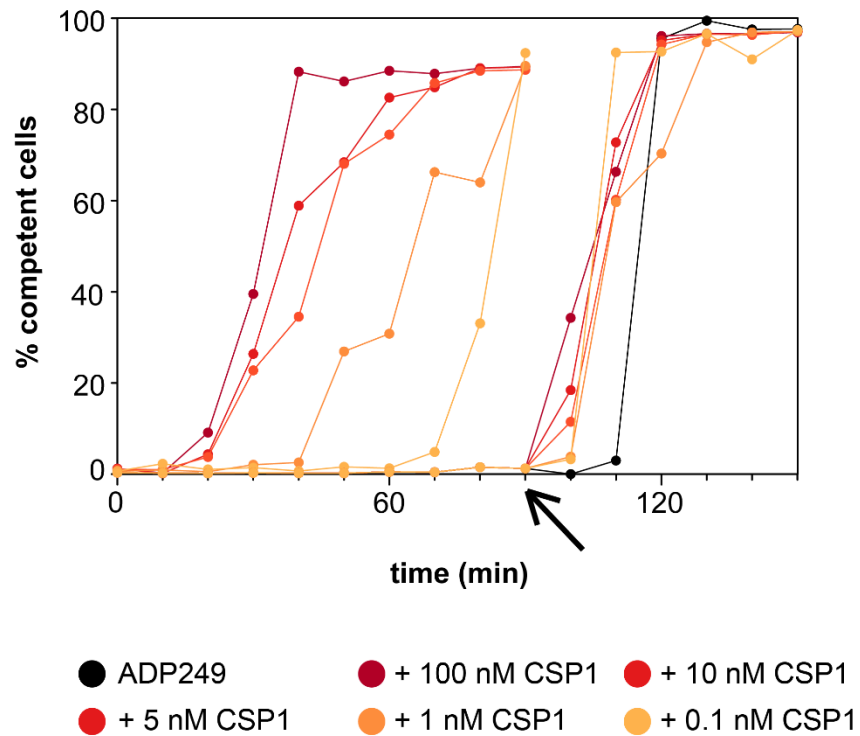

**Figure S20. Competence induction in a range of exogenous CSP1 concentrations.** To track the dynamics of competence induction at the single-cell level, ADP249 (*ssbB-gfp*) was grown in the presence or absence of exogenously added CSP<sub>1</sub>. Cells were analyzed by flow cytometry every 10 minutes. A range of CSP1 concentrations was added at two different time points: at the beginning and after 90 minutes (black arrow).

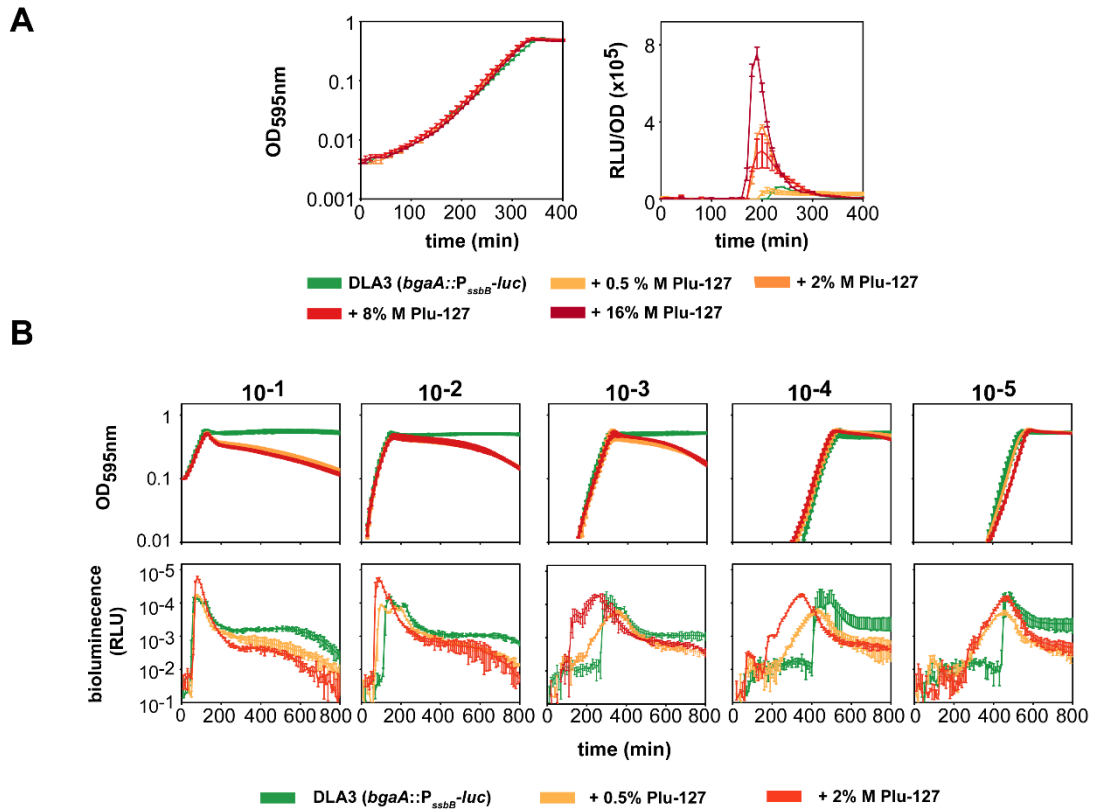

**Figure S21. A)** Effect of medium density on natural competence development. The addition of increasing concentrations of Pluronic-127 results in reduced diffusion of CSP and thereby a strong and earlier natural competence induction. Cells were grown in C+Y with or without the indicated concentrations of Pluronic-127. **B)** Synchronization of competence is affected by a reduction of CSP diffusion. Growth curves ( $OD_{595nm}$ ; top) and competence expression (relative luminescence units; bottom) in a range of initial densities. Cells were grown in C+Y 7.6 (green), in the absence or presence of 0.5% M (orange) or 2% M (red) of the polymer Pluronic-127 (P-127). Average of 3 replicates and Standard Error of the Mean (SEM) are plotted for each of five initial inoculation densities:  $OD_{595nm}$   $10^{-1}$ ,  $10^{-2}$ ,  $10^{-3}$ ,  $10^{-4}$  and  $10^{-5}$ .

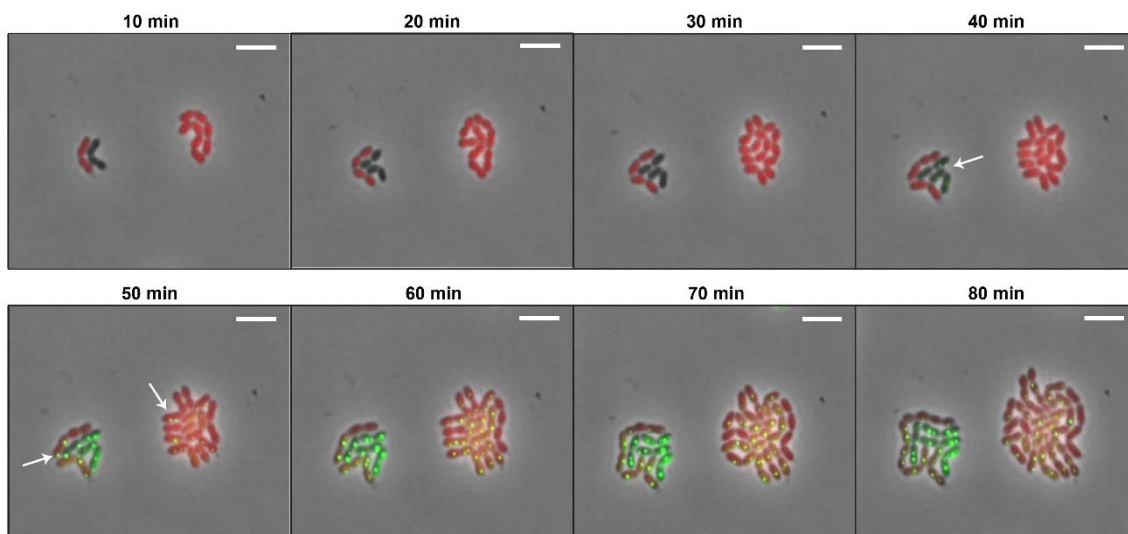

**Figure S22. Time-lapse fluorescence microscopy in 10% acrylamide with 2% Pluronic-127.** Although the presence of Pluronic-127, a polymer that increases the viscosity of the medium, D39V donor (ADP249) releases enough CSP in the medium to be sensed by a  $\Delta comC$  D39V variant (ADP247). White arrows in frame four show that both D39V microcolonies became competent at the same time. Arrows in frame 5 show that there is competence induction in the  $\Delta comC$  mutant, independent of whether cells touch each other (left microcolony) or not (middle microcolony). Scale bar: 4  $\mu\text{m}$ .

**Table S1. List of antibiotics tested for competence induction.**

| <b>Bacterial target</b>   | <b>Antibiotic class</b>          | <b>Antibiotic*</b>                 | <b>Concentration range tested (µg/mL)</b> |
|---------------------------|----------------------------------|------------------------------------|-------------------------------------------|
| Cell-wall inhibitors      | Beta-lactams (carbapenems)       | Imipenem                           | 0.015 - 0.12                              |
|                           |                                  | Meropenem                          | 0.015 - 0.12                              |
|                           | Beta-lactams (monobactams)       | <b>Aztreonam</b>                   | 12.5 – 100                                |
|                           | Beta-lactams (amino-penicillins) | Methicillin                        | 0.016 - 2                                 |
|                           |                                  | Ampicillin                         | 0.0015 – 0.25                             |
|                           |                                  | Amoxicillin                        | 0.0015 – 0.25                             |
|                           |                                  | <b>Amoxicillin/Clavulanic acid</b> | 0.0015/2 – 0.25/2                         |
|                           | Beta-lactams (Cephalosporins)    | Cephalexin (1st generation)        | 0.006 - 1                                 |
|                           |                                  | Cefaclor (2nd generation)          | 0.006 – 1                                 |
|                           |                                  | Cefuroxime (2nd generation)        | 0.006 – 1                                 |
|                           |                                  | Cefotaxime (3rd generation)        | 0.006 – 1                                 |
|                           |                                  | Cefepime (4th generation)          | 0.006 – 1                                 |
|                           | Beta-lactams (antipseudomonal)   | Piperacillin                       | 0.003 – 0.12                              |
| Beta-lactamase inhibitors | <b>Clavulanic acid</b>           | 0.5 – 8                            |                                           |
| Fluoroquinolones          | <b>Ciprofloxacin</b>             | 0.4                                |                                           |

|                              |                 |                             |              |
|------------------------------|-----------------|-----------------------------|--------------|
| DNA replication inhibition   | -               | <b>HPUra</b>                | 0.15         |
| Protein synthesis inhibition | Aminoglycosides | <b>Gentamicin</b>           | 5 – 100      |
|                              |                 | <b>Tobramycin</b>           | 5 – 100      |
|                              | Macrolides      | Clarithromycin (14 carbons) | 0.003 – 0.12 |
|                              |                 | Azithromycin (15 carbons)   | 0.003 – 0.12 |
|                              |                 | Josamycin (16 carbons)      | 0.003 – 0.12 |
| Oxazolidinones               | Linezolid       | 0.06 - 0.5                  |              |

\*In bold, antibiotics that induce competence in C+Y pH 7.3.



**Table S2. Intraspecific *in vitro* horizontal gene transfer (HGT) of antimicrobial resistance determinants\***

| pH  | Experiment             | No. of transformants (cfu/ml)*      | Total viable count (cfu/ml)               | Transformation efficiency                 |
|-----|------------------------|-------------------------------------|-------------------------------------------|-------------------------------------------|
| 7.3 | DLA3 + MK134 (control) | $0 \pm 0$                           | $1.4 \cdot 10^{11} \pm 4.0 \cdot 10^{10}$ | $0 \pm 0$                                 |
|     | DLA3 + MK134 + ATM     | $6.2 \cdot 10^4 \pm 4.1 \cdot 10^3$ | $9.0 \cdot 10^{10} \pm 2.7 \cdot 10^{10}$ | $7.0 \cdot 10^{-7} \pm 2.3 \cdot 10^{-7}$ |
|     | DLA3 + MK134 + CLA     | $2.1 \cdot 10^4 \pm 1.0 \cdot 10^4$ | $9.3 \cdot 10^{10} \pm 1.5 \cdot 10^{10}$ | $2.3 \cdot 10^{-7} \pm 1.4 \cdot 10^{-7}$ |
| 7.5 | DLA3 + MK134 (control) | $2.0 \cdot 10^3 \pm 1.0 \cdot 10^3$ | $1.4 \cdot 10^{11} \pm 3.1 \cdot 10^{10}$ | $1.3 \cdot 10^{-7} \pm 4.3 \cdot 10^{-9}$ |
|     | DLA3 + MK134 + ATM     | $8.4 \cdot 10^4 \pm 4.9 \cdot 10^3$ | $9.0 \cdot 10^{10} \pm 2.6 \cdot 10^{10}$ | $9.9 \cdot 10^{-7} \pm 3.0 \cdot 10^{-7}$ |
|     | DLA3 + MK134 + CLA     | $5.3 \cdot 10^4 \pm 7.5 \cdot 10^3$ | $9.3 \cdot 10^{10} \pm 1.5 \cdot 10^{10}$ | $5.9 \cdot 10^{-7} \pm 1.7 \cdot 10^{-7}$ |

\* Three independent replicates per condition were performed. Strains: DLA3 (D39V, *bgaA::P<sub>ssbB</sub>-luc*, tetracycline resistance marker), MK134 (D39V, *ssbB-luc*, kanamycin resistance marker). Abbreviations: ATM = 28 µg/ml of aztreonam, CLA = 2 µg/ml of clavulanic acid.

**Table S3. Interspecific transfer of DNA from *E. coli* to *S. pneumoniae* promoted by aztreonam**

| <b>Experiment</b>                         | <b>No. of transformants (cfu/ml)*</b> | <b>Total viable count (cfu/ml)</b>  | <b>Transformation efficiency (%)</b>      |
|-------------------------------------------|---------------------------------------|-------------------------------------|-------------------------------------------|
| pLA18 <i>E. coli</i> + D39V<br>SPNE       | $0 \pm 0$                             | $1.9 \cdot 10^8 \pm 7.8 \cdot 10^6$ | $0 \pm 0$                                 |
| pLA18 <i>E. coli</i> + D39V<br>SPNE + ATM | $3.4 \cdot 10^4 \pm 8.5 \cdot 10^3$   | $1.0 \cdot 10^8 \pm 3.5 \cdot 10^6$ | $3.3 \cdot 10^{-4} \pm 9.3 \cdot 10^{-5}$ |

\* Three independent replicates per condition were performed. Abbreviations: ATM: 28 µg/ml of aztreonam; SPNE: *Streptococcus pneumoniae*; *E. coli*: *Escherichia coli* DH5α carrying the high-copy plasmid pLA18, with the tetracycline resistance marker *tetM*. Both SPNE and *E. coli* were co-incubated at the same initial concentration (OD<sub>595nm</sub> 0.04).

**Table S4. Functional analysis of the microarray experiments of *S. pneumoniae* ADP62 (*comC::ery*) grown in presence or absence of antibiotics**

| <b>Condition</b> | <b>Gene regulation</b> | <b>Class</b> | <b>Single list</b>             | <b>Class Size</b> | <b>Description</b>                                        |
|------------------|------------------------|--------------|--------------------------------|-------------------|-----------------------------------------------------------|
| ATM (RE)         | upregulation           | -            |                                |                   |                                                           |
|                  | downregulation         | COG          | 0.00 (3)                       | 209               | Cell wall/membrane/envelope biogenesis                    |
|                  |                        | COG          | 0.00 (3)                       | 159               | Inorganic ion transport and metabolism                    |
|                  |                        | GO           | 0.00022 (2)                    | 7                 | GO:0005315 - phosphate transmembrane transporter activity |
|                  |                        | GO           | 0.00051 (3)                    | 92                | GO:0006810 - transport                                    |
|                  |                        | GO           | 0.00194 (3)                    | 164               | GO:0016020 - membrane                                     |
|                  |                        | KEYWORDS     | 0.00258 (3)                    | 121               | IPR003439 - ABC transporter-like                          |
| KEYWORDS         | 0.00082 (3)            | 66           | IPR003445 - Cation transporter |                   |                                                           |
| ATM (AE)         | upregulation           | -            |                                |                   |                                                           |
|                  | downregulation         | COG          | 0.000 (3)                      | 209               | Cell wall/membrane/envelope biogenesis                    |

|          |                |          |                |     |                                                                  |
|----------|----------------|----------|----------------|-----|------------------------------------------------------------------|
|          |                | GO       | 0.00022<br>(2) | 7   | GO:0005315 - phosphate<br>transmembrane transporter<br>activity  |
|          |                | Others   | 0.0e+00<br>(4) | 23  | t_RNA-Ser                                                        |
|          |                | Others   | 2.1e-06<br>(2) | 2   | Serine protease                                                  |
| CLA (RE) | upregulation   | -        |                |     |                                                                  |
|          | downregulation | -        |                |     |                                                                  |
| CLA (AE) | upregulation   | -        |                |     |                                                                  |
|          | downregulation | COG      | 0.00 (5)       | 209 | Cell<br>wall/membrane/envelope<br>biogenesis                     |
|          |                | COG      | 0.00 (4)       | 159 | Inorganic ion transport and<br>metabolism                        |
|          |                | GO       | 7.4e-05<br>(2) | 7   | GO:0005315 - inorganic<br>phosphate transmembrane<br>transporter |
|          |                | GO       | 0.0e+00<br>(4) | 92  | GO:0006810 - transport                                           |
|          |                | GO       | 0.0e+00<br>(5) | 164 | GO:0016020 - membrane                                            |
|          |                | IPR      | 0.00 (3)       | 37  | IPR000515 - MetI-like<br>domain                                  |
|          |                | KEYWORDS | 0.0e+00<br>(4) | 121 | IPR003439 - ABC<br>transporter-like                              |

|          |                |    |                                                   |
|----------|----------------|----|---------------------------------------------------|
| KEYWORDS | 6.9e-05<br>(3) | 42 | IPR000515 - MetI-like domain                      |
| KEYWORDS | 0.0e+00<br>(4) | 66 | IPR003445 - Cation transporter                    |
| Pfam     | 0.00 (3)       | 37 | PF00528 - Binding-transport system inner membrane |
| Other    | 0.00 (3)       | 37 | SSF161098 - MetI-like                             |

Single list refers to the enrichment p-value, and between brackets, the number of genes in the toplists that are from that class. Class size means the total number of genes in that class. Abbreviations: ATM: aztreonam, CLA: clavulanic acid, RE: rapid exposure, AE: adaptive exposure; COG: clusters of orthologous groups, GO: gene ontology, IPR: interpro.

**Table S5. Summary of gene expression changes in transcriptome comparison of *S. pneumoniae* D39V grown in presence or absence of antibiotics**

| Condition | gene modulation | locus           | gene description                                               | Log2 fold change |
|-----------|-----------------|-----------------|----------------------------------------------------------------|------------------|
| ATM (RE)  | downregulation  | <b>SPD_0741</b> | Putative deoxyribose-specific ABC transporter permease protein | - 1.10           |
|           |                 | <b>SPD_1231</b> | Phosphate transport system permease protein PstC2              | - 1.12           |
|           |                 | SPD_1393        | pyridine nucleotide-disulfide oxidoreductase family protein    | - 1.32           |
|           |                 | <b>SPD_1230</b> | Phosphate transport system permease protein PstA2              | - 1.35           |

|          |                |                 |                                                   |        |
|----------|----------------|-----------------|---------------------------------------------------|--------|
|          |                | <b>SPD_0555</b> | Antibiotic ABC transporter permease protein       | - 1.48 |
| ATM (AE) | downregulation | SPD_1682        | tRNA-Ser2                                         | -1,01  |
|          |                | <b>SPD_1231</b> | Phosphate transport system permease protein PstC2 | -1,01  |
|          |                | SPD_1695        | tRNA-Leu3                                         | -1,13  |
|          |                | SPD_1685        | tRNA-Phe1                                         | -1,13  |
|          |                | <b>SPD_1230</b> | Phosphate transport system permease protein PstA2 | -1,19  |
|          |                | SPD_1760        | tRNA-Cys1                                         | -1,22  |
|          |                | SPD_2069        | SpoJ protein                                      | -1,34  |
|          |                | <b>SPD_0555</b> | Antibiotic ABC transporter permease protein       | -1,36  |
|          |                | SPD_2068        | Serine protease                                   | -1,40  |
|          |                | SPD_0913        | Hypothetical protein                              | -1,46  |
|          |                | <b>SPD_1697</b> | tRNA-Asp-GTC                                      | -1,98  |
|          |                | SPD_1874        | LysM domain-containing protein                    | -2,37  |
| CLA (RE) | upregulation   | SPD_0620        | Lysyl-tRNA synthetase                             | 2.31   |
|          |                | SPD_2028        | Choline binding protein D                         | 1.90   |
|          |                | SPD_1654        | Ribosomal large subunit pseudouridine synthase B  | 1.08   |
|          |                | SPD_0919        | Hypothetical protein                              | 1.04   |
|          | downregulation | SPD_1697        | tRNA-Asp-GTC                                      | - 1.01 |

|          |                |                 |                                                                |        |
|----------|----------------|-----------------|----------------------------------------------------------------|--------|
|          |                | SPD_0361        | Transcriptional regulon                                        | - 1.10 |
| CLA (AE) | upregulation   | SPD_1181        | Hypothetical protein                                           | 1.19   |
|          |                | SPD_2007        | Transporter major facilitator family protein                   | 1.16   |
|          |                | SPD_0141        | Hypothetical protein                                           | 1.04   |
|          |                | SPD_0293        | PTS system transporter subunit IIA                             | 1.02   |
|          |                | SPD_0934        | Tn5252, ORF 10 protein                                         | 1.01   |
|          | downregulation | SPD_1738        | MATE efflux family protein DinF                                | - 1.01 |
|          |                | SPD_1220        | Spermidine/putrescine ABC transporter permease                 | - 1.01 |
|          |                | <b>SPD_0741</b> | Putative deoxyribose-specific ABC transporter permease protein | - 1.15 |
|          |                | <b>SPD_1231</b> | Phosphate transport system permease protein PstC2              | - 1.23 |
|          |                | <b>SPD_1230</b> | Phosphate transport system permease protein PstA2              | - 1.43 |
|          |                | <b>SPD_0555</b> | Antibiotic ABC transporter permease protein                    | - 1.53 |
|          |                | <b>SPD_1697</b> | tRNA-Asp-GTC                                                   | - 1.57 |

Abbreviations: ATM: aztreonam, CLA: clavulanic acid, RE: rapid exposure, AE: adaptive exposure. In bold, genes with transcriptome changes in more than one condition.

**Table S6. List of strains used.**

| <b>S. pneumoniae strains</b> | <b>Relevant genotype</b>                                                                              | <b>Reference</b>          |
|------------------------------|-------------------------------------------------------------------------------------------------------|---------------------------|
| D39V                         | Serotype 2 strain                                                                                     | Avery et al. 1944         |
| DLA3                         | $\Delta bgaA::P_{ssbB-luc}$                                                                           | Slager et al., 2014       |
| MK134                        | $P_{ssbB-ssbB-luc}$                                                                                   | Slager et al., 2014       |
| ADP21                        | $\Delta bgaA::P_{ssbB-luc}, lytB::chl$                                                                | This study                |
| ADP26                        | $\Delta bgaA::P_{ssbB-luc}, CPS::chl$                                                                 | Moreno-Gómez et al., 2017 |
| ADP30                        | $\Delta bgaA::P_{ssbB-luc}, dacC::chl$                                                                | This study                |
| ADP42                        | $\Delta bgaA::P_{ssbB-luc}, cep::P_{Lac-lytB}, lytB::chl$                                             | This study                |
| ADP43                        | $\Delta bgaA::P_{ssbB-luc}, cep::P_{Lac-lytB}, lytB::chl,$<br>$prsA::P_{F6-lacI}, P_{ssbB-ssbB-luc}$  | This study                |
| ADP62                        | $\Delta bgaA::P_{ssbB-luc}, comC::ery$                                                                | Moreno-Gómez et al., 2017 |
| ADP157                       | $\Delta cep::P_3-sgRNA-pbp1A, \Delta bgaA::P_{Lac-dCas9},$<br>$prsA::P_{F6-lacI}, P_{ssbB-ssbB-luc}$  | This study                |
| ADP161                       | $\Delta cep::P_3-sgRNA-pbp2b, \Delta bgaA::P_{Lac-dCas9},$<br>$prsA::P_{F6-lacI}, P_{ssbB-ssbB-luc}$  | This study                |
| ADP165                       | $\Delta cep::P_3-sgRNA-murB, \Delta bgaA::P_{Lac-dCas9},$<br>$prsA::P_{F6-lacI}, P_{ssbB-ssbB-luc}$   | This study                |
| ADP173                       | $\Delta cep::P_3-sgRNA-murA-2, \Delta bgaA::P_{Lac-dCas9},$<br>$prsA::P_{F6-lacI}, P_{ssbB-ssbB-luc}$ | This study                |
| ADP177                       | $\Delta cep::P_3-sgRNA-pbp2x, \Delta bgaA::P_{Lac-dCas9},$<br>$prsA::P_{F6-lacI}, P_{ssbB-ssbB-luc}$  | This study                |



|        |                                                                                                                                                 |                           |
|--------|-------------------------------------------------------------------------------------------------------------------------------------------------|---------------------------|
| ADP178 | $\Delta cep::P_3\text{-sgRNA-}mraY$ , $\Delta bgaA::P_{Lac}\text{-dCas9}$ ,<br>$prsA::P_{F6}\text{-lacI}$ , $P_{ssbB}\text{-ssbB-luc}$          | This study                |
| ADP179 | $\Delta cep::P_3\text{-sgRNA-}murD$ , $\Delta bgaA::P_{Lac}\text{-dCas9}$ ,<br>$prsA::P_{F6}\text{-lacI}$ , $P_{ssbB}\text{-ssbB-luc}$          | This study                |
| ADP180 | $\Delta cep::P_3\text{-sgRNA-}murG$ , $\Delta bgaA::P_{Lac}\text{-dCas9}$ ,<br>$prsA::P_{F6}\text{-lacI}$ , $P_{ssbB}\text{-ssbB-luc}$          | This study                |
| ADP187 | $\Delta cep::P_3\text{-sgRNA-}murE$ , $\Delta bgaA::P_{Lac}\text{-dCas9}$ ,<br>$prsA::P_{F6}\text{-lacI}$ , $P_{ssbB}\text{-ssbB-luc}$          | This study                |
| ADP190 | $\Delta cep::P_3\text{-sgRNA-}murF$ , $\Delta bgaA::P_{Lac}\text{-dCas9}$ ,<br>$prsA::P_{F6}\text{-lacI}$ , $P_{ssbB}\text{-ssbB-luc}$          | This study                |
| ADP203 | $\Delta cep::P_3\text{-sgRNA-}murA\text{-1}$ , $\Delta bgaA::P_{Lac}\text{-dCas9}$ ,<br>$prsA::P_{F6}\text{-lacI}$ , $P_{ssbB}\text{-ssbB-luc}$ | This study                |
| ADP207 | $\Delta cep::P_3\text{-sgRNA-}murC$ , $\Delta bgaA::P_{Lac}\text{-dCas9}$ ,<br>$prsA::P_{F6}\text{-lacI}$ , $P_{ssbB}\text{-ssbB-luc}$          | This study                |
| ADP247 | $\Delta cep::P_3\text{-mkate2}$ , $P_{ssbB}\text{-ssbB-gfp}$ , $comC::ery$                                                                      | Moreno-Gómez et al., 2017 |
| ADP249 | $\Delta cep::P_3\text{-mkate2}$ , $P_{ssbB}\text{-ssbB-gfp}$ , $bgaA::P_{ssbB}\text{-luc}$                                                      | Moreno-Gómez et al., 2017 |
| ADP264 | $\Delta cep::P_3\text{-sgRNA-}pbp3$ , $\Delta bgaA::P_{Lac}\text{-dCas9}$ ,<br>$prsA::P_{F6}\text{-lacI}$ , $P_{ssbB}\text{-ssbB-luc}$          | This study                |
| ADP273 | $P_{ssbB}\text{-ssbB-gfp}$ , $bgaA::P_{ssbB}\text{-luc}$ , $lytB::chl$                                                                          | This study                |
| ADP305 | $\Delta bgaA::P_{ssbB}\text{-luc}$ , $PBP2X^{T550G}$                                                                                            | This study                |
| ADP306 | $\Delta bgaA::P_{ssbB}\text{-luc}$ , $divIVA::ery$                                                                                              | This study                |
| ADP308 | $zip::P_{comC}\text{-comC}^{LP}\text{-hiBiT}$                                                                                                   | This study                |
| ADP309 | $bgaA::P_{ssbB}\text{-luc}$ , $HtrA^{S234A}$                                                                                                    | This study                |

|               |                                                                                                                                          |                     |
|---------------|------------------------------------------------------------------------------------------------------------------------------------------|---------------------|
| ADP310        | $\Delta\text{lytB}::\text{chl}$ , $\text{zip}::P_{\text{comC}}\text{-comC}^{\text{LP}}\text{-hiBiT}$                                     | This study          |
| ADP311        | $\text{zip}::P_{\text{comC}}\text{-comC}^{\text{LP}}\text{-hiBiT}$ , $\text{comAB}::\text{ery}$                                          | This study          |
| ADP312        | $\text{zip}::P_{\text{comC}}\text{-hiBiT}$                                                                                               | This study          |
| E. coli pLA18 | $DH5\alpha$ , plasmid $\text{amp}^R$ , $\text{bgaA}'$ , $\text{tet}^R$ , $P_{\text{ssbB}}\text{-}$<br>$\text{luc\_gfp}$ , $\text{'bgaA}$ | Slager et al., 2014 |

$\text{comC}^{\text{LP}}$  (ADP306) refers to the strain expressing the leader peptide (LP) of ComC fused to the HiBiT-encoded sequence.

## Supplementary methods

**ADP21 and ADP273 strains:** to monitor the effect of chain formation on competence induction, the gene *lytB*, encoding Autolysin B, was replaced by the chloramphenicol resistance marker. The upstream region was amplified using primers ADP1/34 (GATGTGGTGAAAGCAGCTGTGGAAG) and ADP1/35+Ascl (CGATGGCGCGCCTCCTCTGTTCTTATTTATTTTATTG), the downstream region with primers ADP1/36+NotI (CGATGCGGCCGCTACTATAAGTGAATATGATTTGAGTG) and ADP1/37 (GTGTAGAAACCGTCCTCAACCAAG), and the chloramphenicol resistance marker with sPG11+Ascl (ACGTGGCGCGCCAGGAGGCATATCAAATGAAC) and sPG12+NotI (ACGTGCGGCCGCTTATAAAAGCCAGTCATTAG). All three fragments were digested with the proper restriction enzymes (Ascl and/or NotI) and ligated together. The  $\Delta lytB::chl$  fragment containing the chloramphenicol resistance marker flanked by the sequence up- and downstream of *lytB* was transformed into DLA3 resulting in ADP21 strain ( $\Delta bgaA::P_{ssbB-luc}$ ,  $\Delta lytB::chl$ ), and into ADP249 resulting in ADP273 strain ( $\Delta bgaA::P_{ssbB-luc}$ ,  $P_{ssbB-ssbB-gfp}$ ,  $\Delta lytB::chl$ ). Transformants were selected on Columbia blood agar containing 4.5  $\mu\text{g/ml}$  chloramphenicol. Correct deletion was verified by PCR and sequencing.

**ADP30 strain:** to monitor the influence of PBP3 on competence, the related gene was replaced by the chloramphenicol resistance marker. The upstream region was amplified using primers ADP1/59 (GCCCTCAACTCAGCAGTATGG) and ADP1/60+Ascl (CGATGGCGCGCCTTATCCAAGTATCCCTCCATTTC), the downstream region with primers ADP1/61+NotI (CGATGCGGCCGCGAGGTAAGTCAATGTTTCGTAG) and ADP1/62 (AAGCCTGCAATATGCAAGCGATCC), and the chloramphenicol resistance marker with sPG11+Ascl (ACGTGGCGCGCCAGGAGGCATATCAAATGAAC) and sPG12+NotI (ACGTGCGGCCGCTTATAAAAGCCAGTCATTAG). All three fragments were digested with the proper restriction enzymes (Ascl and/or NotI) and ligated. The  $\Delta pbp3::chl$  fragment containing the chloramphenicol resistance marker flanked by the sequence up- and downstream of *pbp3* was transformed into DLA3 resulting in ADP30 strain ( $\Delta bgaA::P_{ssbB-luc}$ ,  $\Delta pbp3::chl$ ). Transformants were selected on Columbia blood agar containing 4.5  $\mu\text{g/ml}$  chloramphenicol. Correct deletion was verified by PCR and sequencing.

**ADP42 and ADP43 strains:** to test whether the ectopic hyperexpression of *LytB* in the  $\Delta lytB$  mutant restored the normal diplococcus phenotype and restored competence development to wild type, we created an inducible expression of *LytB*. The inducible system was created using BglIFusion cloning (Sorg et al., 2015). To amplify the *lytB* fragment, primers ADP1/71+BglIII (ACGTAGATCTAGAGGAAGAAGGTTGATGAAGAAAG) and ADP1/72+XhoI

(CATGCTCGAGTTACTGGAGGGATCCAGTACTAATCTTTG) were used with D39V chromosomal DNA as a template. The construction was transformed into strain ADP21 and transformants (ADP42) were selected on Columbia blood agar containing 100 µg/ml spectinomycin. Correct deletion was verified by PCR and sequencing. ADP42 shows constitutive expression of *lytB* since it lacks the *Lacl* repressor of the IPTG-inducible system. To control the expression of *LytB*, we then transformed the codon-optimized *lacl* gene into strain ADP42. For that, we PCR-ed the fragment with *lacl* integrated into the *prs1/prsA*-locus together with a gentamycin resistance cassette from chromosomal DNA of strain ADP95 (Moreno-Gómez et al. 2017), using primers OLI40 (CCATGGCATCAGCGAGAAGGTGATAC) and OLI41 (GCGGCCGCAGGATAGAAAGGCGAGAG).

**CRISPRi library:** to monitor the effect on competence of the downregulation of genes involved in the cell wall synthesis, the PCR product of the fragment *P<sub>ssbB</sub>-ssbB-luc-kan* from strain MK134 (Slager et al. 2014) was transferred into the CRISPRi library of the indicated genes (Slager et al. 2014; Liu et al. 2017). Transformants were selected on Columbia blood agar containing 250 µg/ml kanamycin resulting in strains listed in table S6.

**ADP305 strain:** to test whether ATM and CLA induce competence in a strain with reduced susceptibility to beta-lactams, we have introduced a point mutation in the *pbp2X* (*PBP2X<sup>T550A</sup>*), which increases the MIC to cefotaxime from 0.02 µg/ml to 0.65 µg/ml. To do so, we have overlapped the PCR products obtained with primers: RS6/31 (CCGAATTGGACGATGCCAAG) and OVL1220 (CGTCAGCAATCTGAGCTCCACCAGACTTGAGGGCTAC), and with ADP4/5 (CAGTGCATGCCTTACATCAAATACAAAATTGCGAGG) and OVL1219 (GTAGCCCTCAAGTCTGGTGGAGCTCAGATTGCTGACG). Overlapped fragment was transformed into DLA3 (*ΔbgaA::P<sub>ssbB</sub>-luc*). Transformants were selected on Columbia blood agar containing 0.1 µg/ml cefotaxime. Correct construct was verified by PCR and sequencing.

**ADP306 strain:** to test the effect of *divIVA* deletion on competence we introduced into DLA3 a PCR product of the construct *divIVA::ery* obtained from strain KB02-34 (Beilharz et al., 2012).

#### **ADP308, ADP310 and ADP311 strains.**

HiBit construct was designed by fusing the C-terminus of the region of interest with the 11-amino acid HiBiT peptide using a 10-amino acid linker. The region of interest was the putative secretion signal (until the double glycine) of *comC*. The expression of these constructs was designed to be

controlled by the *comC* promoter region. The construct (Gblock, IDTlab) was cloned in the pPEPZ plasmid (Keller et al., unpublished) and introduced in D39V strain resulting in ADP308 strain. The PEPZ plasmid integrates at the non-coding gene SPV\_1735 under *zip* name (pPEPZ Integration Position). Transformants were selected on Columbia blood agar containing 100 µg/ml spectinomycin. PCR products of *lytB::chl* (from ADP21, described above) or *comAB::ery* were introduced to ADP308 resulting in strains ADP310 and ADP311, respectively.

***ADP312 strain.***

To confirm that HiBiT luminescence is due to the export of the peptide by ComAB rather than the release by cell lysis, we designed the HiBiT sequence to be controlled by the *comC* promoter, without the leader peptide. Hence, once HiBiT is produced, is accumulated in the cytoplasm. To do so, we overlap the ADP308 construct ( $P_{comC}$ -*comC*<sup>LP</sup>-*hiBit*) with primers OVL2164 (GAAAAACATTTTAGGAGATTTTATTATGGGTGGTGGTGGTTCTGGTGG) and OVL2165 (CCACCAGAACCACCACCACCATAATAAAATCTCCTAAAATGTTTTTC) to remove the leader peptide sequence. Overlapped fragment was transformed into D39V strain.
